1 **Paternal hypoxia exposure primes offspring for increased hypoxia resistance**

2  
3 Alexandria Ragsdale<sup>1‡</sup>, Oscar Ortega-Recalde<sup>2‡</sup>, Ludovic Dutoit<sup>1‡</sup>, Anne A. Besson<sup>1</sup>, Jolyn H.Z.  
4 Chia<sup>1</sup>, Tania King<sup>1</sup>, Shinichi Nakagawa<sup>3</sup>, Anthony Hickey<sup>4</sup>, Neil J. Gemmell<sup>2</sup>, Timothy Hore<sup>2</sup>,  
5 Sheri L. Johnson<sup>\*1</sup>

6  
7 <sup>1</sup> Department of Zoology, University of Otago, Dunedin, New Zealand

8 <sup>2</sup> Department of Anatomy, University of Otago, Dunedin, New Zealand

9 <sup>3</sup> Evolution and Ecology Research Centre, School of Biological, Earth and Environmental  
10 Sciences, University of New South Wales, Sydney, NSW, Australia

11  
12 <sup>4</sup> School of Biological Sciences, University of Auckland, Auckland, New Zealand

13  
14 \*Corresponding author, [sheri.johnson@otago.ac.nz](mailto:sheri.johnson@otago.ac.nz)

15 ‡These authors contributed equally to this work.

16  
17 **ABSTRACT**

18  
19 In a time of rapid environmental change, understanding how the challenges experienced by one  
20 generation can influence the fitness of future generations is critically needed. Using tolerance  
21 assays, transcriptomic and methylome approaches, we use zebrafish as a model to investigate  
22 transgenerational acclimation to hypoxia. We show that short-term paternal exposure to hypoxia  
23 endows offspring with greater tolerance to acute hypoxia. We detected two hemoglobin genes  
24 that are significantly upregulated by more than 7-fold in the offspring of hypoxia exposed males.  
25 Moreover, the offspring which maintained equilibrium the longest showed greatest upregulation  
26 in hemoglobin expression. We did not detect differential methylation at any of the differentially  
27 expressed genes, suggesting that another epigenetic mechanism is responsible for alterations in  
28 gene expression. Overall, our findings suggest that a ‘memory’ of past hypoxia exposure is  
29 maintained and that this environmentally induced information is transferred to subsequent  
30 generations, pre-acclimating progeny to cope with hypoxic conditions.

31  
32  
33  
34  
35  
36  
37  
38  
39  
40  
41  
42  
43  
44  
45  
46  
47  
48  
49  
50  
51  
52  
53  
54  
55

## INTRODUCTION

Paradigm-shifting research has revealed that the life-history experiences of parents can influence the phenotype of their offspring through non-genetic mechanisms (Salinas et al., 2013; Bohacek and Mansuy, 2015; O’Dea et al., 2016; Dias and Ressler, 2013; Gapp et al., 2014; Radford et al., 2014; Burton and Metcalfe, 2014; Bonduriansky, 2012; Bonduriansky and Day, 2008). Non-genetically transmitted phenotypes can be generated by diverse environmental effects, affecting a wide array of offspring traits, both positively and negatively (O’Dea et al., 2016). Work on mice has demonstrated that learned fear responses (Dias and Ressler, 2013; Gapp et al., 2014) and metabolic alterations associated with undernourishment can be inherited via sperm (Radford et al., 2014). These studies suggest that parents can transmit information that may benefit offspring survival. Through this transgenerational plasticity (also known as transgenerational acclimation (Herman and Sultan, 2011; Marshall, 2008)), parents may provide offspring with increased tolerance to environmental perturbations, such as contaminants (Araujo et al., 2019; Kishimoto et al., 2017; Marshall, 2008), food shortages (Kishimoto et al., 2017; Weyrich et al., 2018), carbon dioxide (Allan et al., 2014; Shi et al., 2020; Lee et al., 2020), hypoxia (Ho and Burggren, 2012), but see (Truebano et al., 2018), salinity (Heckwolf et al., 2020, 2018), and temperature (Donelson et al., 2014, 2012; Veilleux et al., 2015; Salinas and Munch, 2012; Weyrich et al., 2018; Ryu et al., 2018). Studies have tended to focus on maternal transgenerational plasticity, or have exposed both parents to the environmental perturbation, making it impossible to disentangle the relative roles of mothers and fathers in altering offspring phenotype (Guillaume et al., 2016; Rutkowska et al., 2020). Thus, a better understanding of the specific role of paternal effects in transgenerational plasticity is needed, especially considering environmental specific information is likely transferred via sperm (see below). Further, the

56 underlying molecular processes have been identified in a just a few studies (Heckwolf et al.,  
57 2020; Kishimoto et al., 2017; Ryu et al., 2018; Shi et al., 2020; Strader et al., 2019; Veilleux et  
58 al., 2015). For example, metabolic genes are upregulated transgenerationally in the damselfish  
59 (*Acanthochromis polyacanthus*), suggesting shifts in energy production for maintaining  
60 performance at elevated temperatures (Veilleux et al., 2015). Potential epigenetic mechanisms  
61 for this transgenerational acclimation have been detected, via differential methylation of genes  
62 involved in energy homeostasis, mitochondrial activity, and oxygen consumption (Ryu et al.,  
63 2018). In a time of rapid environmental change, a better understanding of how environmental  
64 challenges experienced by organisms could increase the fitness of future generations to survive  
65 these same stressors is critically needed.

66 Hypoxia, defined as sufficiently low levels of oxygen to deprive tissues of oxygen, is a  
67 major physiological challenge (Diaz and Rosenberg, 2008; Long et al., 2015; Wang et al., 2016).  
68 The aerobic lifestyle of most animals requires a constant supply of sufficient oxygen, and low  
69 oxygen levels constitute a major environmental threat (Roesner et al., 2006). Hypoxic conditions  
70 precipitate conserved physiological effects in a wide array of vertebrates (Okumura et al., 2003;  
71 Saxena, 1995; Wu et al., 2003), but hypoxia is particularly well-studied in aquatic species. The  
72 total oxygen present in water at 30°C is only 0.5% that of air; hence, physiological stress of  
73 hypoxia challenges many freshwater and marine organisms, and hypoxia is one of the most  
74 widespread issues in aquatic habitats due to the rise of dead zones and climate change (Diaz and  
75 Rosenberg, 2008; Jenny et al., 2016). Thus, it is now more important than ever to understand  
76 how different aquatic species will response to environmental hypoxia.

77 The negative impacts of hypoxia on growth and reproduction are well-recognized  
78 (Townhill et al., 2017; Wu, 2002; Wu et al., 2003), with recent studies also discovering

79 transgenerational effects, whereby marine medaka fish (*Oryzias melastigma*) exposed to hypoxia  
80 show reproductive impairments in F1 and F2 generations, suggesting that hypoxia might pose a  
81 long-lasting threat to fish populations (Lai et al., 2019; Wang et al., 2016). But fishes, in  
82 particular, are also notable for their adaptive abilities to acclimate to hypoxic conditions  
83 (Alexander et al., 2017; Diaz and Rosenberg, 2008; Nikinmaa, 2002; Richards, 2011), including  
84 physiological, morphological, and phenotypic responses. Remarkably, goldfish (*Carassius*  
85 *auratus*) and crucian carp (*Carassius carassius*) exhibit gill remodeling in response to hypoxia  
86 exposure (Dhillon et al., 2013; Tzaneva et al., 2011). Zebrafish embryos and larvae modify  
87 cardiac activity and blood vessel formation in response to hypoxic exposures (Pelster, 2002). In  
88 addition to morphological alternations, gene expression can also be affected by hypoxic  
89 conditions. In zebrafish gill tissue, more than 300 genes are differentially expressed between  
90 hypoxia exposed individuals versus controls; these changes in gene expression are coupled with  
91 morphological changes in gill structure, such as increased surface area of gill tissue (van der  
92 Meer et al., 2005). Prolonged exposure to low oxygen has been shown to improve hypoxia  
93 tolerance in Murray cod (*Maccullochella peelii*; (Gilmore et al., 2020) and snapper (*Pagrus*  
94 *auratus*;(Cook et al., 2013)). Likewise, pre-acclimation of zebrafish larvae to mild hypoxia  
95 significantly improves their resistance to lethal hypoxia, and upregulation of some oxygen  
96 transport genes are associated with this acclimation (Long et al., 2015). Intriguingly, zebrafish  
97 offspring of males and females exposed to chronic hypoxia have a higher resistance to acute  
98 hypoxia than those of controls (Ho and Burggren, 2012), despite the offspring having never been  
99 exposed to hypoxia, suggesting that parents may pass on information that may pre-acclimate  
100 offspring to cope with hypoxic conditions.

101           Gene expression and transgenerational effects can be regulated by epigenetic  
102 modifications, including DNA methylation, histone modifications, and non-coding microRNAs  
103 (O’Dea et al., 2016). For example, in the marine medaka studies, transgenerational effects are  
104 associated with differential methylation in sperm and ovary, with altered gene expression in  
105 genes known to be associated with spermatogenesis and gene silencing (Wang et al., 2016) and  
106 cell cycle control and cell apoptosis (Lai et al., 2019). DNA methylation has also been  
107 investigated as a means underlying transgenerational effects of chemical exposures in zebrafish  
108 (Carvan et al., 2017) and the paternal methylome is believed to be stably transmitted to offspring  
109 in zebrafish (Jiang et al., 2013; Potok et al., 2013) without global reprogramming in primordial  
110 germ cells (Ortega-Recalde et al., 2019; Skvortsova et al., 2019), potentially facilitating  
111 environmental specific information transfer.

112           Here we use zebrafish to further explore the phenomenon of transgenerational  
113 acclimation of hypoxia in fishes. We focus on paternal exposure as we predict that  
114 environmental specific information can be transferred via sperm, as observed in other studies  
115 (Dias and Ressler, 2013; Lamb et al., 2020; Wang et al., 2016). We test whether paternal  
116 exposure to hypoxia stimulates phenotypic responses in offspring, using behavioural  
117 phenotyping to identify resistance to acute hypoxia (time to loss of equilibrium). We then use  
118 RNA-Seq to identify candidate genes that are differentially expressed in control and hypoxic  
119 progeny, and whole genome bisulfite sequencing data to assess whether changes in DNA  
120 methylation underpin alterations in phenotype and gene expression (Figure 1).

121

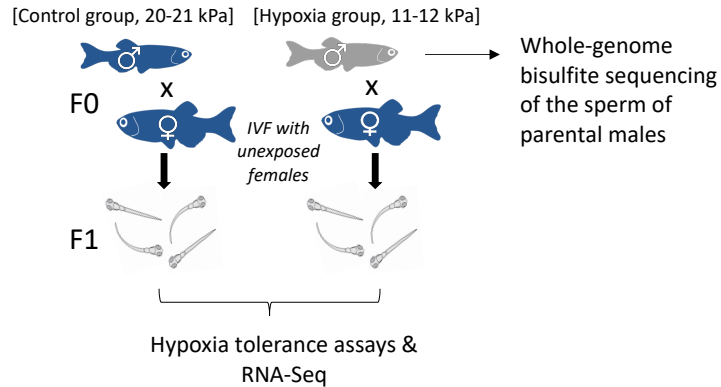

122

123 **Figure 1. Experimental design.** Groups of adult male zebrafish are maintained in normoxia (20-  
124 21 kPa, n = 20) or hypoxia (11-12 kPa, n = 20) for 14 days. Five males from each treatment were  
125 then used to create F1 progeny, crossing the males to unexposed females (n = 5  
126 families/treatment), with half of the sperm used for whole genome bisulfite sequencing, to assess  
127 differential methylation (n = 3 per treatment). At 20-21 days post fertilization, offspring undergo  
128 acute hypoxia tolerance (6-8 offspring/family) assays and n = 3 offspring/treatment are used for  
129 differential gene expression analysis (RNA-Seq).

130

131

## 132 MATERIALS AND METHODS

133

### 134 Fish husbandry

135

136 Breeding and husbandry took place within the Otago Zebrafish Facility (OZF), a temperature-

137 controlled facility maintained at 25-27°C, pH 7-7.8 and conductivity 300-500  $\mu$ S. Fish were

138 maintained in a Tecniplast re-circulating system (Tecniplast, Varese, Italy) under a 14:10

139 light:dark photoperiodic cycle, with 30 minutes of simulated dawn and dusk at the start and end

140 of each day. Acute hypoxia assays took place in the Zoology Department, where room

141 temperature was controlled at 25°C, with a 13.5 hr (0700-2030 hr) light cycle with 30 min of

142 simulated dawn and dusk. Zebrafish were fed twice daily with dry food (ZM000-400, size-

143 dependent) and once daily with live rotifer (*Brachionus* spp. days 5-10 post fertilisation) or

144 artemia (*Artemia salina*; days 10+ post fertilization). All animals were collected and maintained

145 according to the standards of the Animal Ethics Committee for the University of Otago, New  
146 Zealand (protocol no. AEC 44/16).

147  
148 **Hypoxia exposure**

149 In November 2016, nine-month-old male zebrafish (AB wild-type; n=20/treatment) were  
150 exposed to hypoxic conditions (10.91-12.33 kPa  $pO_2$ ) or control conditions (20-21 kPa), for two  
151 weeks. Two glass tanks (36x29x26.5 cm) were separated into three zones (12 x 29 cm), with 10  
152 fish in each outer compartment and two fine bubble diffusers and a filter positioned in the middle  
153 compartment. The oxygen concentration of the treatment tank was maintained by using an  
154 OxyGuard Mini probe (OxyGuard International, Denmark) and oxygen controller (Model  
155 PR5714, PR Electronics, Denmark) that were connected to nitrogen and air cylinders (BOC Gas  
156 Supplies, Food Fresh grade). An on/off relay output from the controller actuated a solenoid-  
157 controlled flow of compressed nitrogen or compressed air (BOC Gas Supplies, New Zealand), to  
158 maintain the system at 53.1-60 % air saturation (= 10.91-12.33 kPa or 4.38-4.95 mg/L) level  
159 (Cook et al., 2013). Normoxic conditions in the control tank (>95% saturation) were maintained  
160 by continually passing air through the bubble diffusers, connected to an air pump. The oxygen  
161 concentration in the tanks was confirmed with a YSI 85 probe (YSI, Inc., Ohio, USA). Both  
162 tanks were siphoned for waste and received 10% water changes every three days. Calibration of  
163 the oxygen probe was checked daily and recalibrated as necessary.

165  
166 **Hypoxia tolerance assays and analysis**

167 Progeny from five families per treatment (n=5 hypoxia, n=5 control) were generated by *in vitro*  
168 fertilisation (IVF) (Johnson Sheri L. et al., 2018; Lamb et al., 2020) seven days after parental  
169 exposure finished. Briefly, eggs and sperm were collected using abdominal massage – half the  
170

171 sperm was used for IVF and the other half was stored for subsequent DNA extraction. Offspring  
172 were reared to 20-21 dpf when n=8 offspring per family (except family C5, where n = 6; total n  
173 = 77) were challenged by acute hypoxia assays in small acrylic chambers (100 mm H x 50 mm x  
174 50 mm). A 0-1 kPa oxygen level was achieved by continually passing compressed nitrogen  
175 through a bubble diffuser for at least 10 minutes before assays and continuously passing the  
176 nitrogen through a valve in the top of the chambers during the assay. The oxygen concentration  
177 fluctuated between 0 and 1%, monitored using a fibre-optic oxygen probe (Foxy OR-125)  
178 attached to an Ocean Optics® USB 2000 spectrophotometer with USB-LS-450 light source and  
179 the manufacturer's software (OOI Sensors). Each fish was filmed for 240 seconds and recorded  
180 with a GoPro Hero 3+ camera. A total of 77 videos (n=37 control, n=40 hypoxia) were tracked  
181 using EthoVision XT behavioral tracking software, version 11.5 (Noldus Information  
182 Technology, Netherlands). Fish were then immediately euthanized by submersion in ice and  
183 stored in RNAlater (Invitrogen). One offspring from family C1 stayed at the bottom the entire  
184 assay, so this individual was removed from further analyses.

185 Resistance to acute hypoxia, defined as the first time that progeny lost equilibrium for 3  
186 seconds or more during hypoxia assays (Ho and Burggren, 2012), and the loss of equilibrium  
187 frequency were analysed using R v. 3.5.1 (R Core Team, 2018). Loss of equilibrium > 3 s was  
188 initially modelled using a gaussian generalized linear model, and loss of equilibrium frequency  
189 as a poisson generalized linear model, with treatment (control vs. hypoxia) as a fixed effect. To  
190 account for multiple fry per family being tested, we also ran the models incorporating Treatment  
191 ID as a random effect, using a gaussian linear model for time to loss of equilibrium > 3 s and a  
192 poisson linear mixed effects model for the loss of equilibrium frequency. Significant  
193 heterogeneity was obvious in the time to loss of equilibrium, so a linear mixed model



194 incorporating heteroscedasticity was compared to the model assuming homogeneity, by  
195 incorporating the variance in Treatment into the model (Cleasby and Nakagawa, 2011).

196  
197 **RNA-Seq library preparation and analysis**

198  
199 Total RNA from six whole 20-21 dpf offspring (3 control offspring, 3 treatment offspring) was  
200 extracted using a Zymo Duet extraction kit (Zymo, NZ). The integrity of RNA samples was  
201 determined using an Agilent RNA 6000 Nano chip on an Agilent 2100 Bioanalyzer to check that  
202 the samples had an RNA Integrity Number (RIN) value of 8–9. Total RNA concentration was  
203 measured by Qubit 2.0 Fluorometer (Qubit RNA HS Assay Kit, Life Technologies). Samples  
204 were sent to the Otago Genomics and Bioinformatics Facility at the University of Otago, under  
205 contract to New Zealand Genomics Limited, for library construction and RNA sequencing.  
206 Messenger RNA sequencing libraries were prepared using the Illumina TruSeq Stranded mRNA  
207 sample preparation kit (Illumina), as per the manufacturer's instructions. RNA sequencing was  
208 performed on the Illumina HiSeq2500 (Illumina, USA) machine with single-ended 100-bp reads  
209 generating 17.4–20.0 million reads per sample.

210       Low quality reads and remaining adapters were trimmed using Trim Galore v0.6.4  
211 [[https://www.bioinformatics.babraham.ac.uk/projects/trim\\_galore/](https://www.bioinformatics.babraham.ac.uk/projects/trim_galore/)] in a two-step process. First,  
212 sequencing adaptors were removed, 10 bp were hard-trimmed from the 5' end to account for  
213 sequence bias produced by PBAT library preparation, and last, low-quality ends from reads  
214 (PHRED score <20) were removed (Bolger et al., 2014). The reads were then aligned to the  
215 zebrafish genome (GCRz11) using HISAT2 v2.2.0 (Kim et al., 2015), informed with the  
216 GCRz11.99 annotation. Expression was summarized sample by sample at the gene level using  
217 featureCounts v2.0.0 (Liao et al., 2014). The analysis of differential expression was conducted in  
218 R v.3.5.0 (R Core Team, 2018) using the DESeq2 package v1.24.0 (Love et al., 2014) without

219 the independent filtering option implemented in the *results* function (see  
220 [https://github.com/OscarOrt/Paternal\\_hypoxia\\_Ragsdale\\_2020](https://github.com/OscarOrt/Paternal_hypoxia_Ragsdale_2020)). Differentially expressed genes  
221 between offspring of fathers exposed to hypoxia and controls were extracted after correcting for  
222 multiple testing using False Discovery Rate cut-off of  $q=0.05$  (Benjamini and Hochberg, 1995a).  
223 In order to test for over/under-representation of biological pathways which differentially  
224 expressed genes are involved, enrichment of Gene Ontology (GO) analysis terms was performed  
225 using Gorilla online accessed on August 4 2020 (Eden et al., 2009).

226

### 227 **Whole genome bisulfite sequencing and analysis**

228 DNA from six parental sperm samples was purified using a modified magnetic bead method  
229 (Peat et al., 2017). WGBS was undertaken using an adapted modified post-bisulfite adaptor  
230 tagging (PBAT) method (Miura et al., 2012; Peat et al., 2014). Briefly, bisulfite treatment was  
231 performed according to the EZ Methylation Direct Mag Prep kit (Zymo, D5044) instruction  
232 manual. Bisulfite treatment was performed before adaptor tagging, enabling simultaneous  
233 conversion of unmethylated cytosines, DNA fragmentation, and improving library preparation  
234 efficiency. Sequencing primers were added using random heptamer primers, and finally, sample-  
235 specific indexes and sequences required for Illumina flow-cells binding were added by PCR.  
236 Library integrity was assessed by agarose gel electrophoresis and a fragment analyser (Agilent)  
237 and sequenced on eight lanes (one flow cell) of an Illumina HiSeq using HiSeq2500 V4  
238 sequencing of 100 bp single ended reads (in combination with 13 other samples, which were part  
239 of another study).

240 Raw reads were trimmed in Trim Galore v0.6.4 as previously mentioned. Read mapping  
241 was performed using Bismark v0.22.3 (Krueger and Andrews, 2011) with the option `--pbat`

242 specified. Zebrafish genome version 11 (GRCz11) was used as reference. BAM files were  
243 deduplicated and reports containing methylation base calls were generated using the  
244 deduplicate\_bismark and bismark\_methylation\_extractor scripts, respectively. The non-  
245 conversion rate during the bisulfite treatment was evaluated by calculating the proportion of non-  
246 CG methylation; by this measure, all libraries must have had a bisulfite conversion efficiency of  
247 at least 98.5% (Table S3).

248 CG methylation calls were analyzed in SeqMonk v1.47.0 [www.  
249 bioinformatics.babraham.ac.uk/projects/seqmonk]. To analyse methylation at gene level, probes  
250 with a minimum of 5 methylation calls were generated and the percentage methylation measured  
251 as number of methylated calls/total calls. CpG islands (CGIs) were identified using Gardiner-  
252 Garden & Frommer's criteria and previously published datasets. For the former, 200-bp windows  
253 moving at 1-bp intervals were considered CGIs if the Obs/Exp value was greater than 0.6 and a  
254 GC content greater than 50%. For the latter, data obtained by biotinylated CxxC affinity  
255 purification (Bio-CAP) and massive parallel sequencing was used to identify non-methylated  
256 CpG islands (Long et al., 2013).

257 Coupling between methylation and gene expression in differentially expressed genes  
258 (DEG) and at genome level was interrogated using methylation levels at transcription start sites  
259 (TSS). TSS were defined as 200 bp centered on the first nucleotide of an annotated mRNA, and a  
260 threshold of at least 20 methylation calls to be included in the analysis. DEG were divided into  
261 underexpressed and overexpressed, whereas coupling at genome level was assessed dividing  
262 gene expression levels into quartiles. Custom annotation tracks were generated using Gviz  
263 v1.28.3 (Hahne and Ivanek, 2016).

264

265 **RESULTS**

266

267 **Hypoxia tolerance assays in unexposed offspring**

268 Progeny of males exposed to moderate hypoxia for 14 days show a greater resistance to acute  
269 hypoxia than progeny of control males – time to loss of equilibrium was, on average, 32 seconds  
270 longer for progeny of hypoxia exposed males ( $t = 2.52$ ,  $p = 0.014$ ; confidence interval (CI) =  
271 7.38, 58.83; Figure 2A) and the progeny of hypoxia exposed males lost equilibrium, on average,  
272 9.18 times vs. 12.32 times in the control progeny ( $t = -4.21$ ,  $p < 0.0001$ , CI = -0.433, -0.158;  
273 Figure 2B). However, when accounting for family (to avoid pseudo-replication due to multiple  
274 offspring per family being tested), the effect of time to loss of equilibrium becomes non-  
275 significant ( $t = 1.67$ ,  $p = 0.133$ , CI = -12.66, 79.22; note this model accounts for observed  
276 heterogeneity in the data), though the effect remains for the number of times offspring lost  
277 equilibrium ( $z = -2.46$ ,  $p = 0.014$ , CI = -0.567, -0.037). Hence, there are strong family effects  
278 (time to loss of equilibrium Treatment ID variance = 42.38; loss of equilibrium frequency  
279 Treatment ID variance = 0.025), with greater resistance to acute hypoxia being observed for just  
280 two families, H1 and H2 (Figure 2C and D).

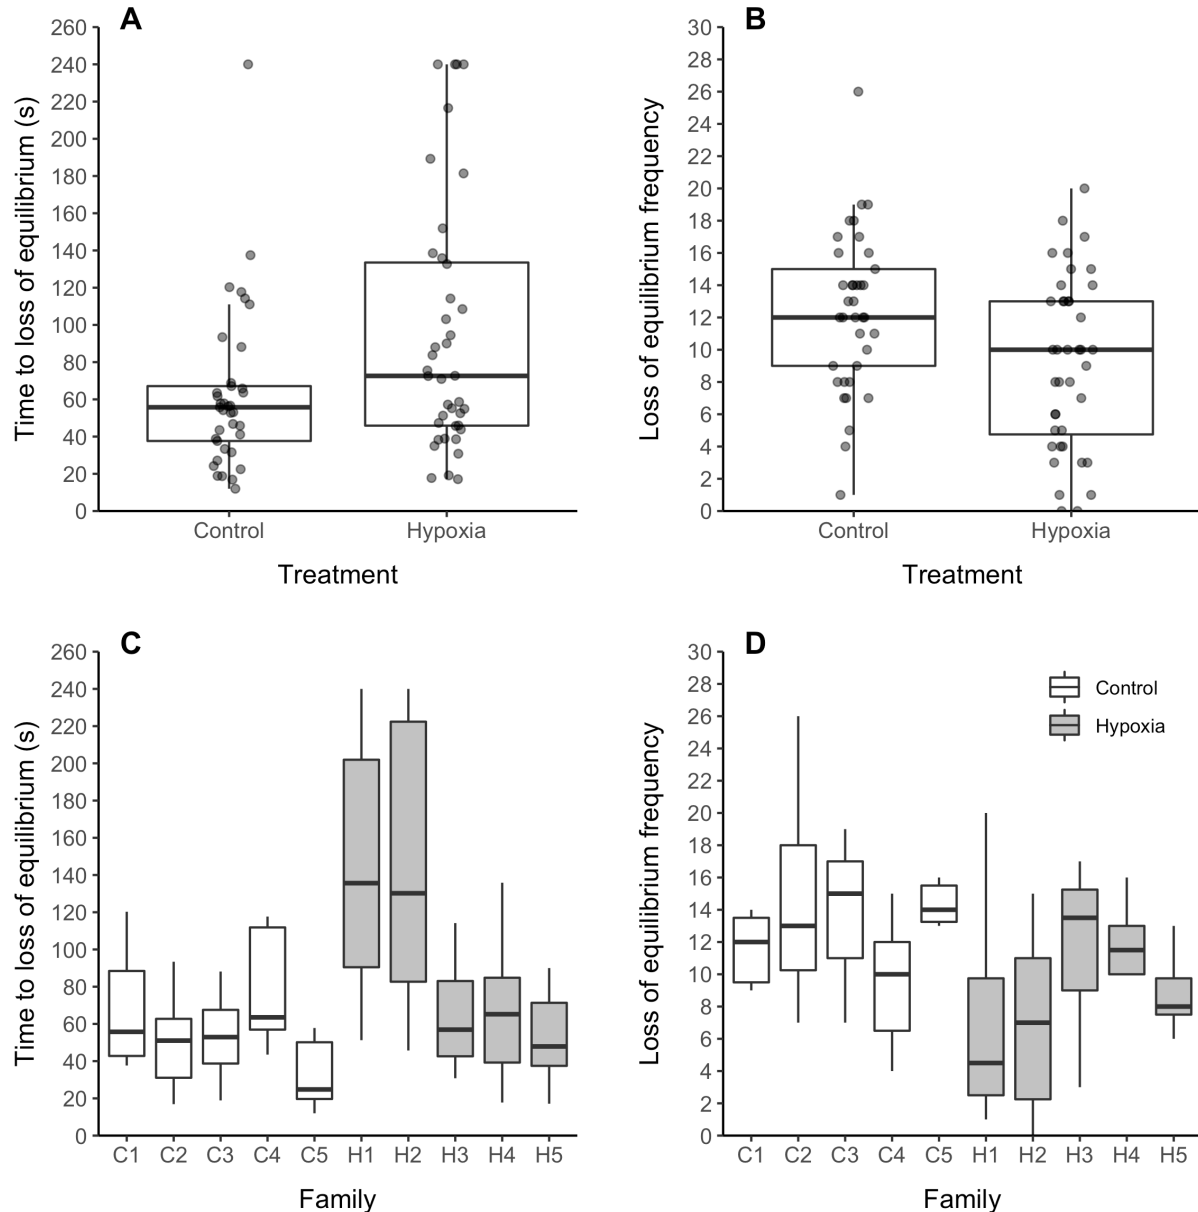

281

282 **Figure 2. Hypoxia tolerance assays of unexposed offspring of control vs. hypoxia treated**  
283 **males.** A and C) Time to first loss of equilibrium >3 sec, B and D) loss of equilibrium frequency  
284 – panels C and D are broken down by family. N = 6-8 progeny/family x 5 families/treatment.  
285 Tolerance assays done at 20-21 days post fertilization, following 14 day parental exposures (20-  
286 21 kPa normoxia control vs. 11-12 kPa hypoxia treatment). Boxes illustrate the interquartile  
287 range (medians, 25<sup>th</sup> and 75<sup>th</sup> percentiles), and whiskers illustrate 1.5 \* the interquartile range,  
288 above and below the 75<sup>th</sup> and 25<sup>th</sup> percentiles.

289

290

291

292

293 **Transcriptome wide gene expression patterns in unexposed offspring**

294 We sequenced 17.4 – 20.0 million reads per sample. Mapping assigned 14.1 – 16.1 million reads  
295 to genes, representing 80.15 – 81.41% of reads uniquely assigned to a gene, with detected  
296 expression in 26,260 of the 32,057 genes in the GRCz11.99 annotation.

297 A total of 91 genes were significantly differentially expressed between the offspring of  
298 control and hypoxia exposed males (Figure 3; Table S1). Of the 91 differentially expressed  
299 genes, 36 genes were significantly upregulated, and 55 were significantly downregulated in the  
300 offspring of hypoxia exposed males (Figure 3). Eight genes exhibited greater than 4-fold change  
301 in differential expression (2 upregulated in hypoxia, 6 downregulated in hypoxia) (Figure 4).  
302 Most notably, two hemoglobin genes (*hbaa1* and *hbz* (*si:ch211-5k11.6*); Figure 4 and 5A) were  
303 upregulated by more than 12-fold in offspring of hypoxia exposed F0 males. Three additional  
304 genes were upregulated by more than 7-fold, but did not pass False Discovery Rate (FDR)  
305 correction – these included a third hemoglobin gene (*hbba1*; Figure 4 and 5A; Table S2) and a  
306 major histocompatibility gene (*mhc1ula*; Figure 4). Importantly, the observed upregulation in  
307 hemoglobin gene expression correlates with the differential family effects observed in our loss of  
308 equilibrium tolerance assays (compare Figure 2 with Figure 5A/Table S2). Sequenced offspring  
309 from the H1 and H2 families, the two families that show the greatest tolerance to acute hypoxia,  
310 also show the greatest upregulation in gene expression. Indeed, the sequenced H1 offspring  
311 never lost equilibrium within our 240s long assay and the sequenced H2 offspring first lost  
312 equilibrium at 216.5s, whereas the third hypoxia offspring, from family H3 (with a first loss of  
313 equilibrium at 181.5s), and the offspring from C1-C3 (first loss of equilibrium > 3 s at 38.8, 24.2  
314 and 18.9s, respectively) show little to no expression at these hemoglobin genes.

315 Six genes were downregulated by more than 4-fold in offspring of hypoxia exposed  
316 males (Figure 4), including *timm23b* (translocase of inner mitochondrial membrane 23 homolog  
317 b (yeast)), *acot21* (acyl-CoA thioesterase 21), *znf1156* (zinc finger protein 1156), *cyt11* (type I  
318 cytokeratin), *irge1* (immunity-related GTP-ase), and *zgc:158417*.

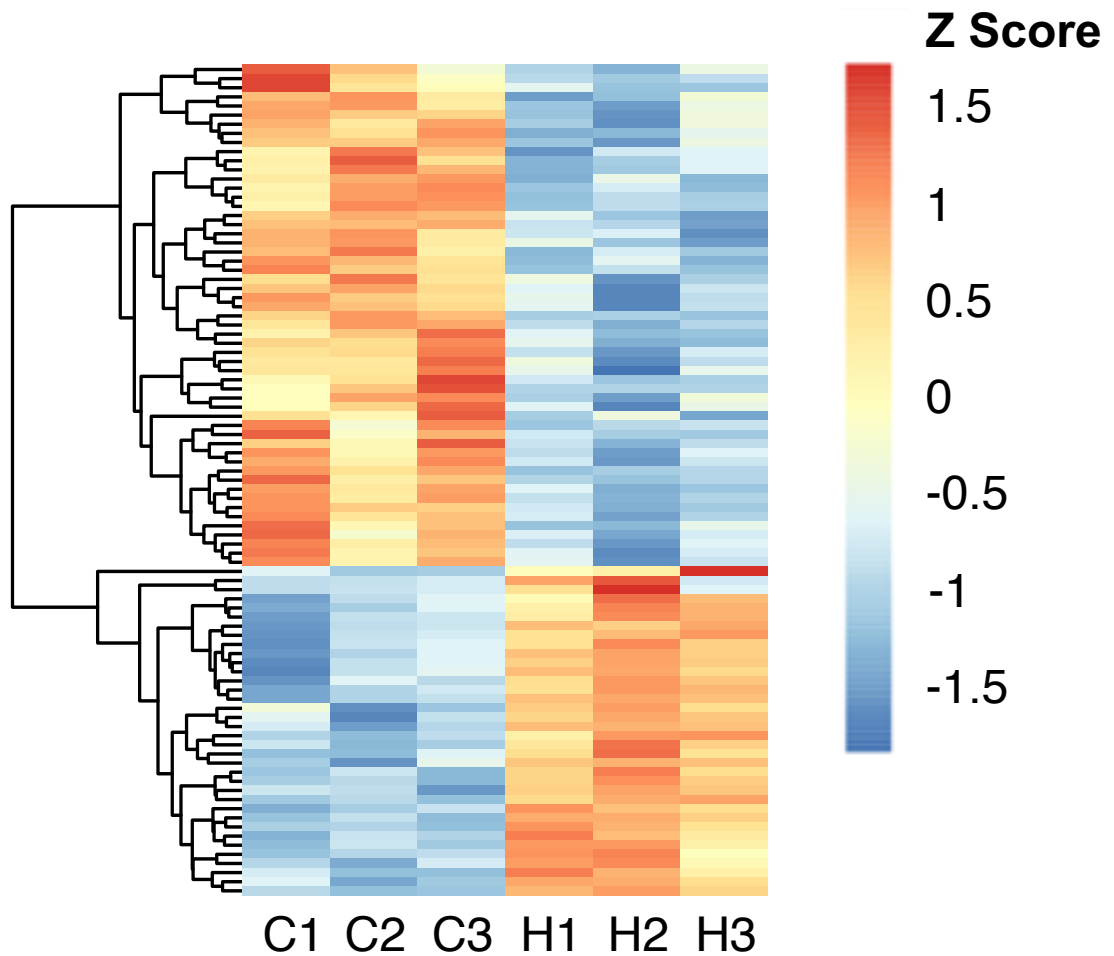

319

320 **Figure 3. Differential gene expression in offspring of control vs. hypoxia treated males.** 91  
321 genes are differentially expressed between the 20-21 day old offspring of hypoxia (n = 3) and  
322 control (n = 3) males, with an FDR < 0.05. Red and blue colours represent higher and lower  
323 expression, respectively.  
324

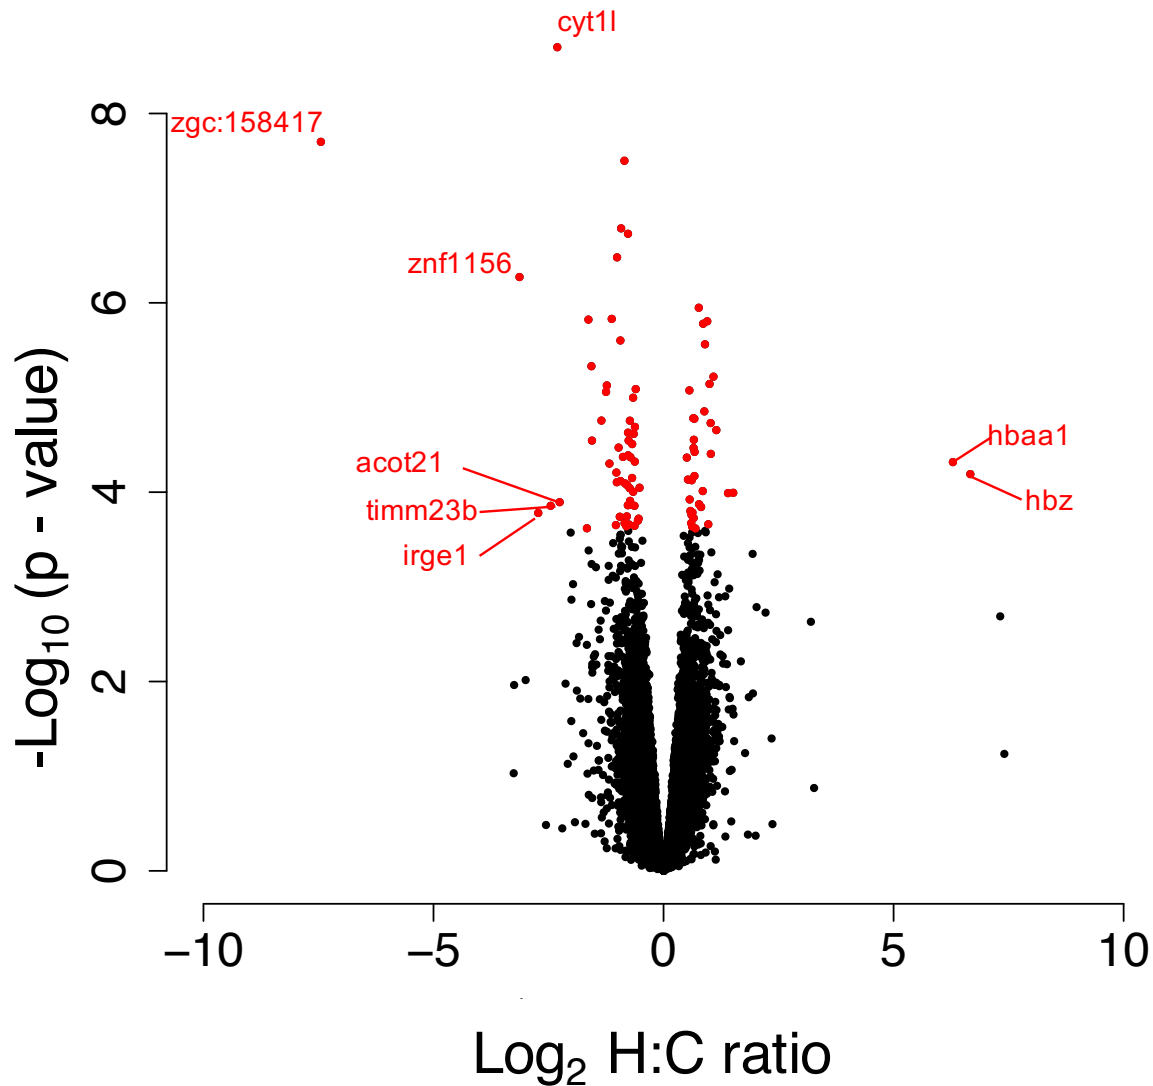

325  
326 **Figure 4. Volcano plot for differentially expressed genes in the offspring of control vs.**  
327 **hypoxia exposed males.** 20-21 day old zebrafish F1 offspring from control (n = 3) and hypoxia  
328 (n = 3) treated males, showing the distribution of significance [ $-\log_{10}(\text{p-value})$ ] vs. fold change  
329 [ $\log_2(\text{fold change})$ ] for all genes. Each circle represents a gene, with significant genes (at 5%  
330 FDR) highlighted in red. Genes with greater than 4-fold change in expression between control  
331 and hypoxia treatments are labelled.  
332

333 Of the genes we analysed, 13,698 were associated with a GO term (including 58 of the 91  
334 differentially expressed genes). Nine GO terms were overrepresented in our differentially



335 expressed genes at a q-value cutoff of 0.1 (Table 1). Several significantly enriched GO terms  
 336 were associated with lytic or proteolytic activity (i.e. serine hydrolase activity, serine-type  
 337 endopeptidase activity, hydrolase activity, serine-type peptidase activity, glutamate  
 338 decarboxylase activity, endopeptidase activity, peptidase activity, peptidase activity, acting on L-  
 339 amino acid peptides). Proteolysis (GO:0006508 p-value =  $7.43 \times 10^{-04}$ ; q-value = 0.7640) tended  
 340 to be over-represented. Genes associated with the process of aging (GO:0007568; p-value = 1.99  
 341  $\times 10^{-05}$ ; q-value = 0.1640) as well as to the response to oxidative stress (GO:0006979; p-value =  
 342  $9.20 \times 10^{-04}$ ; q-value = 0.841) also tended to be over-represented.

343  
 344 **Table 1: Gene Ontology analysis terms associated with differentially expressed genes.** Only  
 345 terms with a False Discovery Rate q-value below 0.1 are displayed.  
 346

| GO term    | Sub-ontology | Description                                         | Enrichment factor | p-value                | FDR q-value            |
|------------|--------------|-----------------------------------------------------|-------------------|------------------------|------------------------|
| GO:0004252 | function     | serine-type endopeptidase activity                  | 15.97             | $2.47 \times 10^{-07}$ | $7.55 \times 10^{-04}$ |
| GO:0008236 | function     | serine-type peptidase activity                      | 13.67             | $7.18 \times 10^{-07}$ | $1.10 \times 10^{-03}$ |
| GO:0017171 | function     | serine hydrolase activity                           | 13.67             | $7.18 \times 10^{-07}$ | $7.30 \times 10^{-04}$ |
| GO:0016787 | function     | hydrolase activity                                  | 2.62              | $1.56 \times 10^{-05}$ | $1.19 \times 10^{-02}$ |
| GO:0004351 | function     | glutamate decarboxylase activity                    | 216.71            | $2.09 \times 10^{-05}$ | $1.28 \times 10^{-02}$ |
| GO:0004175 | function     | endopeptidase activity                              | 6.35              | $3.34 \times 10^{-05}$ | $1.70 \times 10^{-02}$ |
| GO:0070011 | function     | peptidase activity, acting on L-amino acid peptides | 4.84              | $8.66 \times 10^{-05}$ | $3.77 \times 10^{-02}$ |
| GO:0008233 | function     | peptidase activity                                  | 4.64              | $1.19 \times 10^{-04}$ | $4.53 \times 10^{-02}$ |
| GO:0009449 | process      | gamma-aminobutyric acid biosynthetic process        | 216.71            | $2.09 \times 10^{-05}$ | $1.28 \times 10^{-02}$ |

347

348

349 **Global methylation changes in the sperm of parental males and the relationship between**  
350 **methylation in parental sperm and gene expression in offspring**

351  
352 To explore potential mechanistic explanations underlying increased tolerance to acute hypoxia  
353 and differential gene expression in the zebrafish offspring, we conducted whole genome bisulfite  
354 sequencing (WGBS) of sperm from hypoxic ( $n=3$ ) and control males ( $n=3$ ). We obtained an  
355 average of 67,891,334 reads per methylome ( $SEM \pm 2,551,964$ ) and a mapping efficiency of  
356 45.02% ( $SEM \pm 0.07\%$ ). Global cytosine-guanine (CG) dinucleotide methylation levels showed  
357 no differences between hypoxia and control samples (84.15% and 84.23%, respectively;  $p >$   
358 0.05).

359 In jawed vertebrates, methylation of transcription start sites (TSS), and in particular  
360 regions enriched on CG dinucleotides (CGIs), is associated with transcriptional silencing (Peat et  
361 al., 2014). For two example cases, the upregulated hemoglobin cluster and the downregulated  
362 *acot21* gene, we characterized methylation at individual positions and CGI using statistical and  
363 experimental criteria (Gardiner-Garden and Frommer, 1987; Long et al., 2013). No differences in  
364 methylation levels were observed for these genes (Figure 5A). Next, we explored methylation  
365 levels for all differentially expressed genes. Using a threshold of 20 methylation calls we  
366 obtained 29 and 23 genes for the upregulated and downregulated groups. Whereas  
367 downregulated genes are hypermethylated and upregulated genes are hypomethylated for  
368 hypoxia and control samples, TSS methylation values remain stable when both groups of  
369 samples are compared (Figure 5B). Finally, we explored the global effect of DNA methylation  
370 on gene expression using expression quantiles. We found methylation levels in the parental  
371 sperm and gene expression in the F1 offspring are coupled in hypoxia and control samples  
372 (Figure 5C).

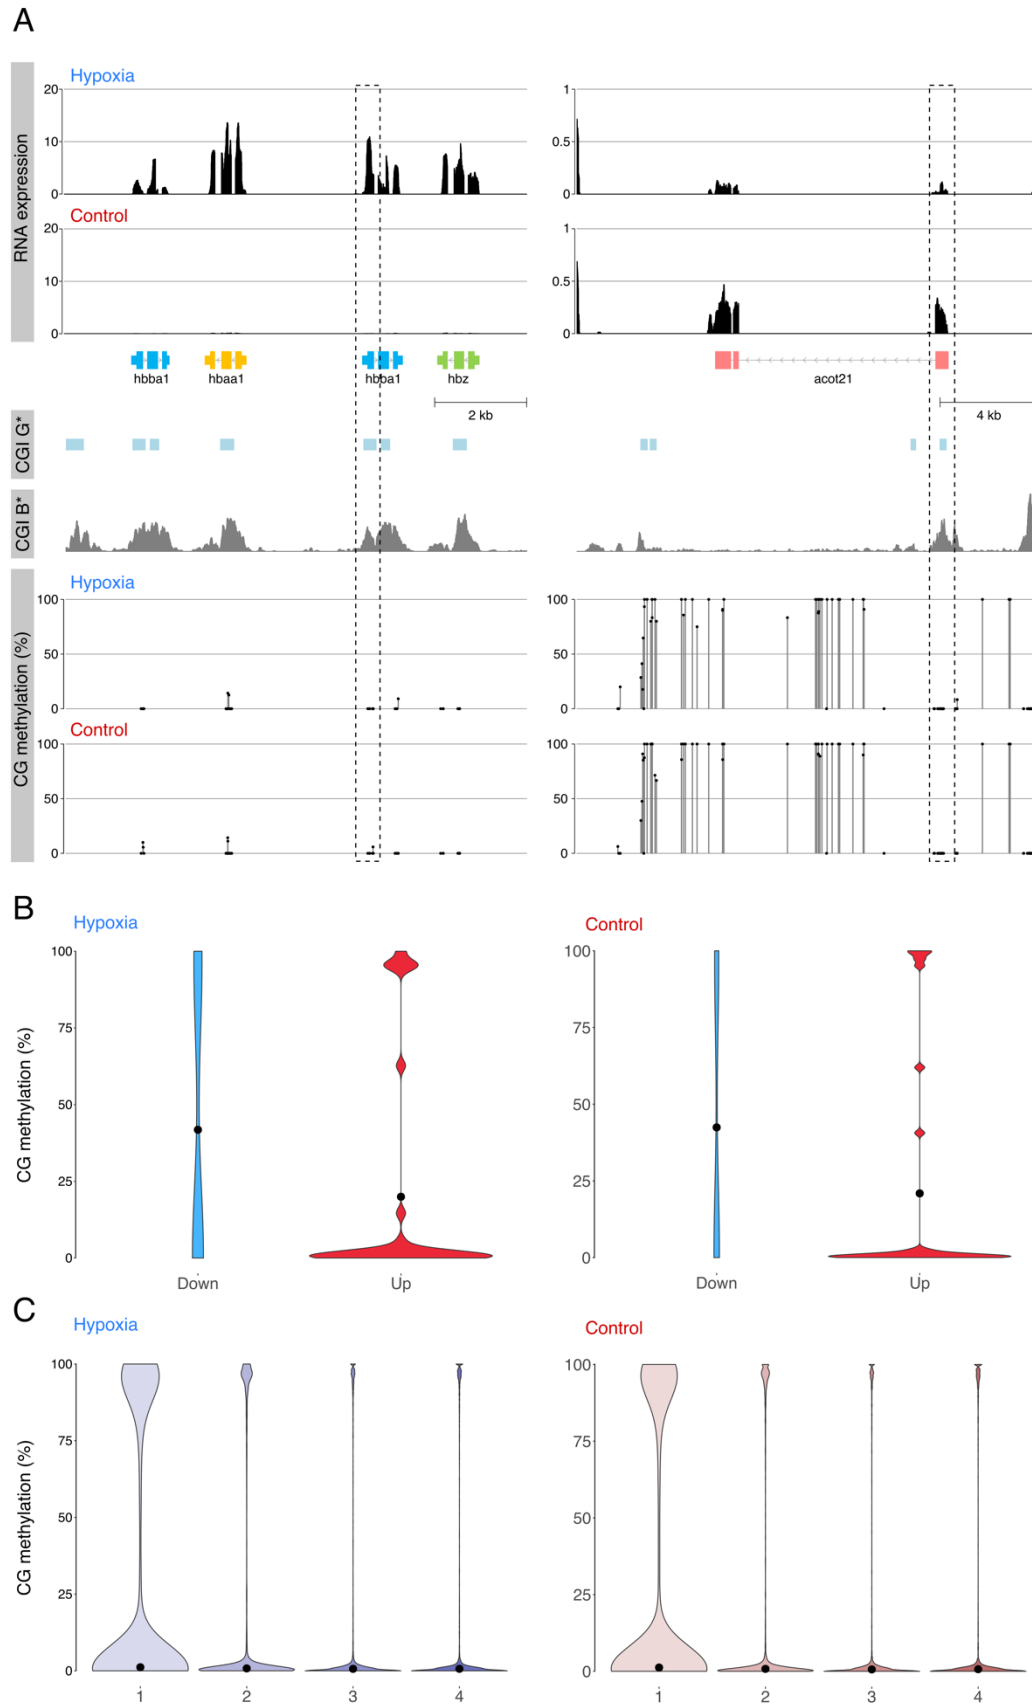

374 **Figure 5. Global methylation changes and relationship between methylation in the sperm of**  
375 **hypoxia vs. control parental males and gene expression in the F1 progeny.** A) Relationship  
376 between CpG methylation and RNA expression for Hb cluster and acot 21. CG methylation track  
377 shows methylation levels for dinucleotides with >5 calls; CGIs were predicted according to the  
378 Gardiner-Garden and Frommer criteria (CGI G\*) and CxxC affinity purification (CGI B\*). No  
379 changes in TSS methylation containing CGIs (dashed box) were observed for both genes  
380 (bottom). B) Violin plot showing distribution of methylation at transcription start sites (TSS) of  
381 differentially expressed genes in the F1 progeny. Downregulated genes are hypermethylated  
382 when compared to upregulated genes, however no clear differences were observed between both  
383 conditions. C) Violin plot showing distribution of methylation at TSS of genes classified into  
384 quartiles according to expression level (highest, 4). Each violin is scaled to the same maximum  
385 width (total area is not constant between violins) to demonstrate distributions for each quartile.  
386 Black dots denote the median.  
387

## 388 **DISCUSSION**

389  
390 We demonstrate that paternal exposure to hypoxia alters both the phenotypic response to hypoxia  
391 and gene expression in the offspring. Larvae of fathers that experienced moderate hypoxia-  
392 maintained equilibrium in acute hypoxia for longer than those of controls, indicating that  
393 paternal exposure stimulated a higher tolerance to hypoxic conditions. Using next-generation  
394 sequencing, we also detected significant changes in gene expression between control and  
395 hypoxia offspring, with two key hemoglobin genes upregulated in offspring of hypoxia exposed  
396 males –genes which may mediate the observed phenotypic differences, as they are involved in  
397 oxygen transport. This pattern of inheritance, through the paternal line, could have large  
398 evolutionary consequences as fathers are able to pass down valuable information to offspring  
399 that may enable better survival. However, the underlying mechanism for this transmission  
400 remains unknown, as we did not detect any differential methylation in the sperm of parental  
401 males at any of the differentially expressed genes.  
402

403 Importantly, our study provides evidence of increased tolerance to acute hypoxia through  
404 paternal exposure, thus, adding to increasing evidence that environmental challenges experienced

405 by ancestors can provide progeny with environmental specific information that might allow  
406 future generations to survive the same environmental challenge, i.e., transgenerational plasticity  
407 (Donelson et al., 2014, 2012; Heckwolf et al., 2018; Herman and Sultan, 2011; Lee et al., 2020;  
408 Marshall, 2008; Ryu et al., 2018; Veilleux et al., 2015). In a previous study, 20 dpf larvae  
409 exposed to 4 kPa pO<sub>2</sub> revealed that offspring of parents exposed to hypoxia had longer time to  
410 loss of equilibrium (hypoxia resistance; (Ho and Burggren, 2012)). In preliminary trials, we  
411 found no behavioral differences using these oxygen parameters; thus, we increased the  
412 magnitude of hypoxia, exposing larvae to ~1 kPa, which produced the expected phenotypic  
413 differences. Importantly, the previous study (Ho and Burggren, 2012) did not differentiate  
414 between maternal and paternal effects and did not provide a possible mechanism underlying this  
415 phenotypic effect.

416         It is important to note that our study detects intergenerational acclimation, with potential  
417 for transgenerational acclimation. A transgenerational study requires rearing fish through to  
418 create an F2 generation. Indeed, few studies that claim transgenerational acclimation are truly  
419 transgenerational, as the studies are conducted across a single generation (O’Dea et al., 2016).  
420 Even if parents are exposed to environmental challenges prior to maturity, the primordial germ  
421 cells are still exposed to the challenge as well. Regardless, our results suggest that parents are  
422 passing on information that may benefit offspring survival, thus facilitating acclimation to  
423 environmental conditions.

424         To try and understand the underlying mechanism priming progeny to better cope with  
425 hypoxic conditions, we conducted transcriptomic analysis of the progeny. We detected 91 genes  
426 that were differentially expressed in the offspring of paternal males that were exposed to  
427 moderate hypoxia for two-weeks. Most notably, two hemoglobin genes (*hbaa1* and *hbz*)

428 exhibited over 7-fold differential expression, were upregulated in offspring of males exposed to  
429 hypoxia, with another hemoglobin gene, *hbba1*, also upregulated, though non-significantly.  
430 Remarkably, sequenced offspring from the H1 and H2 families, the two families that show the  
431 greatest tolerance to acute hypoxia also show the greatest upregulation in hemoglobin gene  
432 expression (Table S3). *hbaa1*, *hbz* and *hbba1* are all found on chromosome 3, and are part of the  
433 major hemoglobin locus responsible for heme binding, and are instrumental in oxygen transport  
434 (Ganis et al., 2012). Exposing fish to hypoxia is typically considered to improve hypoxia  
435 tolerance through alterations in hemoglobin, hemoglobin-O<sub>2</sub> binding affinities, or cardiac  
436 function to improve low O<sub>2</sub> performance (Cook et al., 2013). Thus, differential expression of  
437 hemoglobin genes (up-regulated in offspring from hypoxia exposed fathers) could indicate  
438 altered physiological mechanisms to combat low oxygen, which could be precipitating the  
439 increased tolerance to acute hypoxia in the H1 and H2 families.

440         The relationship between hypoxia and hemoglobin function has been studied in larval  
441 zebrafish, suggesting that zebrafish larvae might be able to upregulate hemoglobin concentration  
442 in response to chronic hypoxia (Schwerte et al., 2003). Under normoxic conditions, oxygen  
443 supply via diffusion seems to be sufficient to meet metabolic demands up to 12-14 dpf in  
444 zebrafish, but larvae appear to be able to use a circulatory system as a backup where necessary  
445 (Schwerte et al., 2003). Further, impaired hemoglobin function does not impair routine oxygen  
446 usage in normoxia or at moderate levels of hypoxia in 5-42 dpf larvae, but functional  
447 hemoglobin does allow larvae to sequester extra oxygen from water in extreme hypoxic  
448 conditions (Rombough and Drader, 2009). Larvae express embryonic/larval globins early in  
449 development, but somewhere between days 16 and 22 the embryonic/larval globins begin to  
450 decline (Ganis et al., 2012; Tiedke et al., 2011), and adult globin expression increases, with the

451 adult globin expression pattern nearly completely established by day 32dpf. *hbae5*  
452 (ENSDARG00000045142) is the only embryonic/larval hemoglobin to show any pattern of  
453 differential expression in our transcriptomic data. We found that this gene was highly expressed  
454 and upregulated twice as much in our hypoxia offspring than in our control, though not  
455 significantly differentiated after FDR correction ( $p = 0.014$ ,  $q = 0.391$ ). *hbae5* expression appears  
456 to peak around 22 dpf (Ganis et al., 2012), so upregulation of this gene should result in higher  
457 affinity for oxygen, which may help explain the increased tolerance to the acute hypoxia that we  
458 observed in our 20-21 dpf progeny. *hbae5* has also been shown to be up-regulated more than 5-  
459 fold by hypoxia in zebrafish larvae directly exposed to hypoxia; ((Long et al., 2015); note that  
460 *hbae5* is called *hbz* in their study).

461 In addition to two genes upregulated over 7-fold in offspring of hypoxia exposed males,  
462 six genes were downregulated by more than 4-fold as well. These include *tim23b* (translocase  
463 of inner mitochondrial membrane 23 homolog b (yeast)), an integral component of membranes.  
464 Gene *acot21* (acyl-CoA thioesterase 12), is a key component of acyl-CoA metabolic processes  
465 with thiolester hydrolase activity and found in the cytoplasm. Gene *znf1156* (zinc finger protein  
466 1156) has metal ion binding functions. Gene *zgc:158417* and *irge1* (immunity-related GTP-ase  
467 family) are predicted to be integral component of membranes and used in GTP binding. Gene  
468 *cyt11* (type I cytokeratin) is predicted to have structural molecule activity. While there is little  
469 information on these downregulated genes, expression changes of such significant magnitude are  
470 likely to have large consequences.

471 An HRGFish database (Rashid et al., 2017) reports 50 key genes that are altered through  
472 hypoxia, but we did not find any of them to be differentially expressed in our transcriptomic data  
473 (Table S1, showing data for 46 of the 50 HRGFish genes referenced for the zebrafish),

474 suggesting that the genes that are altered by direct exposure to hypoxia may be quite different to  
475 those that may be passed on to future generations of hypoxia exposed ancestors. Importantly,  
476 transcriptomic studies of F1 and F2 adult tissues, like heart, gill, brain and liver, might reveal  
477 differential expression of some of these key hypoxia genes.

478         Interestingly, our GO analysis highlighted an overrepresentation of genes associated with  
479 aging and oxidative stress. Studies have previously hypothesized a link between hypoxia (and  
480 effects on respiration), oxidative stress (and free radical production) and aging in humans  
481 (Katschinski, 2006; Valli et al., 2015), with several studies demonstrating age-related changes in  
482 the hypoxia inducible factor system.

483         DNA methylation is known to be altered by hypoxia exposure in fishes (Lai et al., 2019;  
484 Wang et al., 2016) and other vertebrates (Childebayeva et al., 2019; Zhang et al., 2017). Thus,  
485 we hypothesized that hypoxia might produce changes in the paternal methylome, which are  
486 inherited to the offspring, explaining the observed tolerance to acute hypoxia and differential  
487 gene expression. Interesting, we found methylation levels and gene expression were coupled in  
488 our hypoxia and control samples, despite the different tissues of origin for the methylome and  
489 RNA expression data. This coupling supports a common pattern between the paternal methylome  
490 and expression levels of the embryo. Yet, we observed no differences in methylation levels in  
491 any differentially expressed genes, including the hemoglobin cluster, suggesting that sperm  
492 methylation patterns are not responsible for changes in the observed changes in gene expression  
493 in our study, or perhaps through epigenetic control away from the focal genes. The medaka  
494 studies (Lai et al., 2019; Wang et al., 2016) exposed fish to a similar level of hypoxia, but for a  
495 much longer period, the entire 3-month life cycle, which may explain why they observed  
496 differential methylation in the sperm and we did not. If alterations to DNA methylation are not



497 responsible for the changes in gene expression observed in our study, then perhaps histone  
498 modifications or miRNAs are at play. miRNA in medaka have also been identified as a potential  
499 underlying mechanism of transgenerational testis impairment induced by hypoxia by targeting  
500 genes associated with stress responses, cell cycle, epigenetic modifications, sugar metabolism,  
501 and cell motion (Tse et al., 2016).

502 In conclusion, our study demonstrates that paternal exposure to hypoxia is able to endow  
503 offspring with a higher resistance to hypoxic conditions and that upregulation of genes at the  
504 hemoglobin gene complex on chromosome 3 may explain these phenotypic effects. This study is  
505 the first to demonstrate that paternal exposure alone can mediate these changes in phenotype and  
506 gene expression. These findings suggest that paternal inheritance may be providing offspring  
507 with valuable environmental specific information (a ‘memory’) that could increase their survival,  
508 though it is unclear how this information is transmitted as we did not detect any differential  
509 methylation in the sperm of control and hypoxia treated males. Regardless, the variability in  
510 tolerance to acute hypoxia that we observed between hypoxia families suggests that progeny of  
511 different genotypes respond to hypoxia in different ways, phenotypically (i.e., an epigenotype x  
512 environment interaction). In other words, environmental specific information is transferred  
513 through some genotypes, but not others, suggesting that pre-acclimation to hypoxic conditions  
514 may be driven by an interaction between the genotype, the epigenotype and the environment.

515  
516

517 **Acknowledgements.** We thank Denham Cook for advice on designing our hypoxia system,  
518 Murray McKenzie for construction of the hypoxia system, and Sean Divers for help with set up  
519 and construction of the acute hypoxia assay chambers. Greg Gimenez provided advice on  
520 RNASeq analyses and Noel Jhinku and other members of the Otago Zebrafish Facility assisted  
521 with fish husbandry. **Funding.** This work was supported by a Royal Society of New Zealand  
522 Marsden Fund grant (UOO1507) and a University of Otago Research Grant to S.L.J. The funders  
523 had no role in study design, data collection and analysis, decision to publish, or preparation of  
524 the manuscript. **Authors’ contributions.** S.L.J., T.H. and N.G. conceived the study. A.R., A.B.,

525 J.C., and T.K. collected the data. A.R., S.L.J., O.O. and L.D. performed the analyses. A.R. and  
526 S.L.J led the writing of the manuscript, with assistance from O.O. and L.D. for bioinformatics  
527 aspects, and all the authors contributed to revisions. **Competing interests.** The authors declare  
528 no competing financial interests. **Data and materials accessibility.** The raw phenotypic data can  
529 be found at <https://osf.io/xpy8j/>. The accession number for the RNA-Seq and WGBS datasets  
530 reported in this paper is GEO:GSE160662. The source code for the bioinformatic analysis is  
531 publicly available on GitHub [https://github.com/OscarOrt/Paternal\\_hypoxia\\_Ragsdale\\_2020](https://github.com/OscarOrt/Paternal_hypoxia_Ragsdale_2020).

532

### 533 SUPPLEMENTARY MATERIALS

534 Supplementary material for this article is available at...

535

536 Table S1. Results of differential gene expression analysis

537 Table S2. Read counts mapping to four hemoglobin genes

538 Table S3. Whole genome bisulfite sequencing summary data

539

### 540 References.

541 Alexander TJ, Vonlanthen P, Seehausen O. 2017. Does eutrophication-driven evolution change  
542 aquatic ecosystems? *Philosophical Transactions of the Royal Society B: Biological*

543 *Sciences* **372**:20160041. doi:10.1098/rstb.2016.0041

544 Allan BJM, Miller Gabrielle M., McCormick Mark I., Domenici Paolo, Munday Philip L. 2014.

545 Parental effects improve escape performance of juvenile reef fish in a high-CO2 world.

546 *Proceedings of the Royal Society B: Biological Sciences* **281**:20132179.

547 doi:10.1098/rspb.2013.2179

548 Araujo GS, Abessa DMS, Soares AMVM, Loureiro S. 2019. Multi-generational effects under

549 single and pulse exposure scenarios in two monophyletic *Daphnia* species. *Science of The*

550 *Total Environment* **697**:134031. doi:10.1016/j.scitotenv.2019.134031

551 Benjamini Y, Hochberg Y. 1995a. Controlling the False Discovery Rate: A practical and

552 powerful approach to multiple testing. *Journal of the Royal Statistical Society Series B*

553 *(Methodological)* **57**:289–300.

554 Benjamini Y, Hochberg Y. 1995b. Controlling the False Discovery Rate: A Practical and

555 Powerful Approach to Multiple Testing. *Journal of the Royal Statistical Society Series B*

556 *(Methodological)* **57**:289–300.

557 Bohacek J, Mansuy IM. 2015. Molecular insights into transgenerational non-genetic inheritance

558 of acquired behaviours. *Nature Reviews Genetics* **16**:641.

559 Bolger AM, Lohse M, Usadel B. 2014. Trimmomatic: a flexible trimmer for Illumina sequence

560 data. *Bioinformatics* **30**:2114–2120. doi:10.1093/bioinformatics/btu170

561 Bonduriansky R. 2012. Rethinking heredity, again. *Trends in Ecology & Evolution* **27**:330–336.

562 doi:10.1016/j.tree.2012.02.003

563 Bonduriansky R, Day T. 2008. Nongenetic Inheritance and Its Evolutionary Implications. *Annu*

564 *Rev Ecol Evol Syst* **40**:103–125. doi:10.1146/annurev.ecolsys.39.110707.173441

565 Burton T, Metcalfe NB. 2014. Can environmental conditions experienced in early life influence

566 future generations? *Proceedings of the Royal Society B: Biological Sciences*

567 **281**:20140311. doi:10.1098/rspb.2014.0311

568 Carvan MJ III, Kalluvila TA, Klingler RH, Larson JK, Pickens M, Mora-Zamorano FX,

569 Connaughton VP, Sadler-Riggelman I, Beck D, Skinner MK. 2017. Mercury-induced

570 epigenetic transgenerational inheritance of abnormal neurobehavior is correlated with

- 571 sperm epimutations in zebrafish. *PLOS ONE* **12**:e0176155.  
572 doi:10.1371/journal.pone.0176155
- 573 Childebayeva A, Harman T, Weinstein J, Goodrich JM, Dolinoy DC, Day TA, Bigham AW,  
574 Brutsaert TD. 2019. DNA Methylation Changes Are Associated With an Incremental  
575 Ascent to High Altitude. *Frontiers in Genetics* **10**:1062. doi:10.3389/fgene.2019.01062
- 576 Cleasby IR, Nakagawa S. 2011. Neglected biological patterns in the residuals: A behavioural  
577 ecologist's guide to co-operating with heteroscedasticity. *Behavioral Ecology and*  
578 *Sociobiology* **65**:2361–2372.
- 579 Cook DG, Iftikar FI, Baker DW, Hickey AJR, Herbert NA. 2013. Low-O<sub>2</sub> acclimation shifts the  
580 hypoxia avoidance behaviour of snapper (*Pagrus auratus*) with only subtle changes in  
581 aerobic and anaerobic function. *J Exp Biol* **216**:369. doi:10.1242/jeb.073023
- 582 Dhillon RS, Yao L, Matey V, Chen B-J, Zhang A-J, Cao Z-D, Fu S-J, Brauner CJ, Wang YS,  
583 Richards JG. 2013. Interspecific differences in hypoxia-induced gill remodeling in carp.  
584 *Physiological and Biochemical Zoology* **86**:727–739. doi:10.1086/673180
- 585 Dias BG, Ressler KJ. 2013. Parental olfactory experience influences behavior and neural  
586 structure in subsequent generations. *Nature Neuroscience* **17**:89.
- 587 Diaz RJ, Rosenberg R. 2008. Spreading dead zones and consequences for marine ecosystems.  
588 *Science* **321**:926. doi:10.1126/science.1156401
- 589 Donelson JM, McCormick MI, Booth DJ, Munday PL. 2014. Reproductive acclimation to  
590 increased water temperature in a tropical reef fish. *PLOS ONE* **9**:e97223.  
591 doi:10.1371/journal.pone.0097223
- 592 Donelson JM, Munday PL, McCormick MI, Pitcher CR. 2012. Rapid transgenerational  
593 acclimation of a tropical reef fish to climate change. *Nature Climate Change* **2**:30–32.  
594 doi:10.1038/nclimate1323
- 595 Eden E, Navon R, Steinfeld I, Lipson D, Yakhini Z. 2009. GOrilla: a tool for discovery and  
596 visualization of enriched GO terms in ranked gene lists. *BMC Bioinformatics* **10**:48.  
597 doi:10.1186/1471-2105-10-48
- 598 Ganis JJ, Hsia N, Trompouki E, de Jong JLO, DiBiase A, Lambert JS, Jia Z, Sabo PJ, Weaver  
599 M, Sandstrom R, Stamatoyannopoulos JA, Zhou Y, Zon LI. 2012. Zebrafish globin  
600 switching occurs in two developmental stages and is controlled by the LCR.  
601 *Developmental Biology* **366**:185–194. doi:10.1016/j.ydbio.2012.03.021
- 602 Gapp K, Jawaid A, Sarkies P, Bohacek J, Pelczar P, Prados J, Farinelli L, Miska E, Mansuy IM.  
603 2014. Implication of sperm RNAs in transgenerational inheritance of the effects of early  
604 trauma in mice. *Nature Neuroscience* **17**:667.
- 605 Gardiner-Garden M, Frommer M. 1987. CpG Islands in vertebrate genomes. *Journal of*  
606 *Molecular Biology* **196**:261–282. doi:10.1016/0022-2836(87)90689-9
- 607 Gilmore KL, Doubleday ZA, Gillanders BM. 2020. Prolonged exposure to low oxygen improves  
608 hypoxia tolerance in a freshwater fish. *Conservation Physiology* **7**.  
609 doi:10.1093/conphys/coz058
- 610 Guillaume AS, Monro K, Marshall DJ. 2016. Transgenerational plasticity and environmental  
611 stress: do paternal effects act as a conduit or a buffer? *Functional Ecology* **30**:1175–1184.  
612 doi:10.1111/1365-2435.12604
- 613 Hahne F, Ivanek R. 2016. Visualizing Genomic Data Using Gviz and Bioconductor In: Mathé E,  
614 Davis S, editors. *Statistical Genomics: Methods and Protocols*. New York, NY: Springer  
615 New York. pp. 335–351. doi:10.1007/978-1-4939-3578-9\_16

- 616 Heckwolf MJ, Meyer BS, Döring T, Eizaguirre C, Reusch TBH. 2018. Transgenerational  
617 plasticity and selection shape the adaptive potential of sticklebacks to salinity change.  
618 *Evolutionary Applications* **11**:1873–1885. doi:10.1111/eva.12688
- 619 Heckwolf MJ, Meyer BS, Häsler R, Höppner MP, Eizaguirre C, Reusch TBH. 2020. Two  
620 different epigenetic information channels in wild three-spined sticklebacks are involved  
621 in salinity adaptation. *Sci Adv* **6**:eaaz1138. doi:10.1126/sciadv.aaz1138
- 622 Herman J, Sultan S. 2011. Adaptive transgenerational plasticity in plants: case studies,  
623 mechanisms, and implications for natural populations. *Frontiers in Plant Science* **2**:102.  
624 doi:10.3389/fpls.2011.00102
- 625 Ho DH, Burggren WW. 2012. Parental hypoxic exposure confers offspring hypoxia resistance in  
626 zebrafish (*Danio rerio*). *J Exp Biol* **215**:4208. doi:10.1242/jeb.074781
- 627 Jenny J-P, Francus P, Normandeau A, Lapointe F, Perga M-E, Ojala A, Schimmelmänn A,  
628 Zolitschka B. 2016. Global spread of hypoxia in freshwater ecosystems during the last  
629 three centuries is caused by rising local human pressure. *Global Change Biology*  
630 **22**:1481–1489. doi:10.1111/gcb.13193
- 631 Jiang L, Zhang Jing, Wang J-J, Wang L, Zhang L, Li G, Yang X, Ma X, Sun X, Cai J, Zhang  
632 Jun, Huang X, Yu M, Wang X, Liu F, Wu C-I, He C, Zhang B, Ci W, Liu J. 2013.  
633 Sperm, but not oocyte, DNA methylome is inherited by zebrafish early embryos. *Cell*  
634 **153**:773–784. doi:10.1016/j.cell.2013.04.041
- 635 Johnson Sheri L., Zellhuber-McMillan Sylvia, Gillum Joanne, Dunleavy Jessica, Evans Jonathan  
636 P., Nakagawa Shinichi, Gemmell Neil J. 2018. Evidence that fertility trades off with early  
637 offspring fitness as males age. *Proceedings of the Royal Society B: Biological Sciences*  
638 **285**:20172174. doi:10.1098/rspb.2017.2174
- 639 Katschinski DM. 2006. Is there a molecular connection between hypoxia and aging?  
640 *Experimental Gerontology* **45**:482–484. doi:doi:10.1016/j.exger.2005.12.003
- 641 Kim D, Langmead B, Salzberg SL. 2015. HISAT: a fast spliced aligner with low memory  
642 requirements. *Nature Methods* **12**:357.
- 643 Kishimoto S, Uno M, Okabe E, Nono M, Nishida E. 2017. Environmental stresses induce  
644 transgenerationally inheritable survival advantages via germline-to-soma communication  
645 in *Caenorhabditis elegans*. *Nature Communications* **8**:14031.
- 646 Krueger F, Andrews SR. 2011. Bismark: a flexible aligner and methylation caller for Bisulfite-  
647 Seq applications. *Bioinformatics* **27**:1571–1572. doi:10.1093/bioinformatics/btr167
- 648 Lai KP, Wang SY, Li JW, Tong Y, Chan TF, Jin N, Tse A, Zhang JW, Wan MT, Tam N, Au  
649 DWT, Lee B-Y, Lee J-S, Wong AST, Kong RYC, Wu RSS. 2019. Hypoxia causes  
650 transgenerational impairment of ovarian development and hatching success in fish.  
651 *Environ Sci Technol* **53**:3917–3928. doi:10.1021/acs.est.8b07250
- 652 Lamb SD, Chia JHZ, Johnson SL. 2020. Paternal exposure to a common herbicide alters the  
653 behavior and serotonergic system of zebrafish offspring. *PLOS ONE* **15**:e0228357.  
654 doi:10.1371/journal.pone.0228357
- 655 Lee YH, Jeong C-B, Wang M, Hagiwara A, Lee J-S. 2020. Transgenerational acclimation to  
656 changes in ocean acidification in marine invertebrates. *Marine Pollution Bulletin*  
657 **153**:111006. doi:10.1016/j.marpolbul.2020.111006
- 658 Liao Y, Smyth GK, Shi W. 2014. featureCounts: an efficient general purpose program for  
659 assigning sequence reads to genomic features. *Bioinformatics* **30**:923–930.  
660 doi:10.1093/bioinformatics/btt656

- 661 Long HK, Sims D, Heger A, Blackledge NP, Kutter C, Wright ML, Grützner F, Odom DT,  
662 Patient R, Ponting CP, Klose RJ. 2013. Epigenetic conservation at gene regulatory  
663 elements revealed by non-methylated DNA profiling in seven vertebrates. *eLife*  
664 **2**:e00348. doi:10.7554/eLife.00348
- 665 Long Y, Yan J, Song G, Li Xiaohui, Li Xixi, Li Q, Cui Z. 2015. Transcriptional events co-  
666 regulated by hypoxia and cold stresses in zebrafish larvae. *BMC Genomics* **16**:385.  
667 doi:10.1186/s12864-015-1560-y
- 668 Love MI, Huber W, Anders S. 2014. Moderated estimation of fold change and dispersion for  
669 RNA-seq data with DESeq2. *Genome Biology* **15**. doi:10.1186/s13059-014-0550-8
- 670 Marshall DJ. 2008. Transgenerational plasticity in the sea: context-dependent maternal effects  
671 across the life history. *Ecology* **89**:418–427. doi:10.1890/07-0449.1
- 672 Miura F, Enomoto Y, Dairiki R, Ito T. 2012. Amplification-free whole-genome bisulfite  
673 sequencing by post-bisulfite adaptor tagging. *Nucleic Acids Research* **40**:e136–e136.  
674 doi:10.1093/nar/gks454
- 675 Nikinmaa M. 2002. Oxygen-dependent cellular functions—why fishes and their aquatic  
676 environment are a prime choice of study. *Comparative Biochemistry and Physiology Part*  
677 *A: Molecular & Integrative Physiology* **133**:1–16. doi:10.1016/S1095-6433(02)00132-0
- 678 O’Dea RE, Noble DWA, Johnson SL, Hesselson D, Nakagawa S. 2016. The role of non-genetic  
679 inheritance in evolutionary rescue: epigenetic buffering, heritable bet hedging and  
680 epigenetic traps. *Environmental Epigenetics* **2**. doi:10.1093/eep/dvv014
- 681 Okumura A, Fuse H, Kawauchi Y, Mizuno I, Akashi T. 2003. Changes in male reproductive  
682 function after high altitude mountaineering. *High Altitude Medicine & Biology* **4**:349–  
683 353. doi:10.1089/152702903769192304
- 684 Ortega-Recalde O, Day RC, Gemmell NJ, Hore TA. 2019. Zebrafish preserve global germline  
685 DNA methylation while sex-linked rDNA is amplified and demethylated during  
686 feminisation. *Nature Communications* **10**:3053. doi:10.1038/s41467-019-10894-7
- 687 Peat J, Ortega-Recalde O, Kardailsky O, Hore T. 2017. The elephant shark methylome reveals  
688 conservation of epigenetic regulation across jawed vertebrates. *F1000Research* **6**.  
689 doi:10.12688/f1000research.11281.1
- 690 Peat JR, Dean W, Clark SJ, Krueger F, Smallwood SA, Ficiz G, Kim JK, Marioni JC, Hore TA,  
691 Reik W. 2014. Genome-wide bisulfite sequencing in zygotes identifies demethylation  
692 targets and maps the contribution of TET3 oxidation. *Cell Reports* **9**:1990–2000.  
693 doi:10.1016/j.celrep.2014.11.034
- 694 Pelster B. 2002. Developmental plasticity in the cardiovascular system of fish, with special  
695 reference to the zebrafish. *Comparative Biochemistry and Physiology Part A: Molecular*  
696 *& Integrative Physiology* **133**:547–553. doi:10.1016/S1095-6433(02)00194-0
- 697 Potok ME, Nix DA, Parnell TJ, Cairns BR. 2013. Reprogramming the maternal zebrafish  
698 genome after fertilization to match the paternal methylation pattern. *Cell* **153**:759–772.  
699 doi:10.1016/j.cell.2013.04.030
- 700 R Core Team. 2018. R: A Language and Environment for Statistical Computing. Vienna,  
701 Austria: R Foundation for Statistical Computing.
- 702 Radford EJ, Ito M, Shi H, Corish JA, Yamazawa K, Isganaitis E, Seisenberger S, Hore TA, Reik  
703 W, Erkek S, Peters AHFM, Patti M-E, Ferguson-Smith AC. 2014. In utero effects. In  
704 utero undernourishment perturbs the adult sperm methylome and intergenerational  
705 metabolism. *Science* **345**:1255903–1255903. doi:10.1126/science.1255903

- 706 Rashid I, Nagpure NS, Srivastava P, Kumar R, Pathak AK, Singh M, Kushwaha B. 2017.  
707 HRGFish: A database of hypoxia responsive genes in fishes. *Scientific Reports* **7**:42346.  
708 Richards JG. 2011. Physiological, behavioral and biochemical adaptations of intertidal fishes to  
709 hypoxia. *J Exp Biol* **214**:191. doi:10.1242/jeb.047951  
710 Roesner A, Hankeln T, Burmester T. 2006. Hypoxia induces a complex response of globin  
711 expression in zebrafish (*Danio rerio*). *J Exp Biol* **209**:2129. doi:10.1242/jeb.02243  
712 Rombough P, Drader H. 2009. Hemoglobin enhances oxygen uptake in larval zebrafish (*Danio*  
713 *rerio*) but only under conditions of extreme hypoxia. *J Exp Biol* **212**:778.  
714 doi:10.1242/jeb.026575  
715 Rutkowska J, Lagisz M, Bonduriansky R, Nakagawa S. 2020. Mapping the past, present and  
716 future research landscape of paternal effects. *BMC Biology* **18**:183. doi:10.1186/s12915-  
717 020-00892-3  
718 Ryu T, Veilleux HD, Donelson JM, Munday PL, Ravasi T. 2018. The epigenetic landscape of  
719 transgenerational acclimation to ocean warming. *Nature Climate Change* **8**:504–509.  
720 doi:10.1038/s41558-018-0159-0  
721 Salinas S, Brown SC, Mangel M, Munch S. 2013. Non-genetic inheritance and changing  
722 environments. *Non-genetic Inheritance* 38–50. doi:10.2478/ngi-2013-0005  
723 Salinas S, Munch SB. 2012. Thermal legacies: transgenerational effects of temperature on  
724 growth in a vertebrate. *Ecology Letters* **15**:159–163. doi:10.1111/j.1461-  
725 0248.2011.01721.x  
726 Saxena DK. 1995. Effect of hypoxia by intermittent altitude exposure on semen characteristics  
727 and testicular morphology of male rhesus monkeys. *International Journal of*  
728 *Biometeorology* **38**:137–140. doi:10.1007/BF01208490  
729 Schwerte T, Überbacher D, Pelster B. 2003. Non-invasive imaging of blood cell concentration  
730 and blood distribution in zebrafish (*Danio rerio*) incubated in hypoxic conditions in vivo.  
731 *J Exp Biol* **206**:1299. doi:10.1242/jeb.00249  
732 Shi D, Zhao C, Chen Y, Ding J, Zhang L, Chang Y. 2020. Transcriptomes shed light on  
733 transgenerational and developmental effects of ocean warming on embryos of the sea  
734 urchin *Strongylocentrotus intermedius*. *Scientific Reports* **10**:7931. doi:10.1038/s41598-  
735 020-64872-x  
736 Skvortsova K, Tarbashevich K, Stehling M, Lister R, Irimia M, Raz E, Bogdanovic O. 2019.  
737 Retention of paternal DNA methylome in the developing zebrafish germline. *Nature*  
738 *Communications* **10**:3054. doi:10.1038/s41467-019-10895-6  
739 Strader ME, Wong JM, Kozal LC, Leach TS, Hofmann GE. 2019. Parental environments alter  
740 DNA methylation in offspring of the purple sea urchin, *Strongylocentrotus purpuratus*.  
741 *Journal of Experimental Marine Biology and Ecology* **517**:54–64.  
742 doi:10.1016/j.jembe.2019.03.002  
743 Tiedke J, Gerlach F, Mitz SA, Hankeln T, Burmester T. 2011. Ontogeny of globin expression in  
744 zebrafish (*Danio rerio*). *Journal of Comparative Physiology B* **181**:1011–1021.  
745 doi:10.1007/s00360-011-0588-9  
746 Townhill BL, Pinnegar JK, Righton DA, Metcalfe JD. 2017. Fisheries, low oxygen and climate  
747 change: how much do we really know? *Journal of Fish Biology* **90**:723–750.  
748 doi:10.1111/jfb.13203  
749 Truebano M, Tills O, Collins M, Clarke C, Shippersides E, Wheatley C, Spicer JJ. 2018. Short-term  
750 acclimation in adults does not predict offspring acclimation potential to hypoxia.  
751 *Scientific Reports* **8**:3174. doi:10.1038/s41598-018-21490-y

- 752 Tse AC-K, Li J-W, Wang SY, Chan T-F, Lai KP, Wu RS-S. 2016. Hypoxia alters testicular  
753 functions of marine medaka through microRNAs regulation. *Aquatic Toxicology*  
754 **180**:266–273. doi:10.1016/j.aquatox.2016.10.007
- 755 Tzaneva V, Bailey S, Perry SF. 2011. The interactive effects of hypoxemia, hyperoxia, and  
756 temperature on the gill morphology of goldfish (*Carassius auratus*). *American Journal of*  
757 *Physiology-Regulatory, Integrative and Comparative Physiology* **300**:R1344–R1351.  
758 doi:10.1152/ajpregu.00530.2010
- 759 Valli A, Harris AL, Kessler BM. 2015. Hypoxia metabolism in ageing. *Aging (Albany NY)*  
760 **7**:465–466. doi:10.18632/aging.100782
- 761 van der Meer DLM, van den Thillart GEEJM, Witte F, de Bakker MAG, Besser J, Richardson  
762 MK, Spaink HP, Leito JTD, Bagowski CP. 2005. Gene expression profiling of the long-  
763 term adaptive response to hypoxia in the gills of adult zebrafish. *American Journal of*  
764 *Physiology-Regulatory, Integrative and Comparative Physiology* **289**:R1512–R1519.  
765 doi:10.1152/ajpregu.00089.2005
- 766 Veilleux HD, Ryu T, Donelson JM, van Herwerden L, Seridi L, Ghosheh Y, Berumen ML,  
767 Leggat W, Ravasi T, Munday PL. 2015. Molecular processes of transgenerational  
768 acclimation to a warming ocean. *Nature Climate Change* **5**:1074.
- 769 Wang SY, Lau K, Lai K-P, Zhang J-W, Tse AC-K, Li J-W, Tong Y, Chan T-F, Wong CK-C,  
770 Chiu JM-Y, Au DW-T, Wong AS-T, Kong RY-C, Wu RS-S. 2016. Hypoxia causes  
771 transgenerational impairments in reproduction of fish. *Nature Communications* **7**:12114.  
772 doi:10.1038/ncomms12114
- 773 Weyrich A, Lenz D, Fickel J. 2018. Environmental change-dependent inherited epigenetic  
774 response. *Genes* **10**:4. doi:10.3390/genes10010004
- 775 Wu RSS. 2002. Hypoxia: from molecular responses to ecosystem responses. *Marine Pollution*  
776 *Bulletin* **45**:35–45. doi:10.1016/S0025-326X(02)00061-9
- 777 Wu RSS, Zhou BS, Randall DJ, Woo NYS, Lam PKS. 2003. Aquatic hypoxia is an endocrine  
778 disruptor and impairs fish reproduction. *Environ Sci Technol* **37**:1137–1141.  
779 doi:10.1021/es0258327
- 780 Zhang Yawen, Gou W, Ma J, Zhang Hongliang, Zhang Ying, Zhang Hao. 2017. Genome  
781 methylation and regulatory functions for hypoxic adaptation in Tibetan chicken embryos.  
782 *PeerJ* **5**:e3891–e3891. doi:10.7717/peerj.3891  
783





**Table S2: Read counts mapping to four haemoglobin genes located on a small region of chromosome 3.** \* genes are not significantly differentially expressed but show strong expression in samples H1 and H2 who were the most resilient to loss of equilibrium in hypoxic environment. Note that there are two versions of *hbba1* due to genome duplication, and they are physically separated on chromosome 3.

| Ensembl ID         | Gene name     | C1 | C2 | C3 | H1  | H2   | H3 |
|--------------------|---------------|----|----|----|-----|------|----|
| ENSDARG00000079078 | <i>hbz</i>    | 0  | 0  | 2  | 9   | 303  | 1  |
| ENSDARG00000097011 | <i>hbaa1</i>  | 2  | 1  | 17 | 671 | 1427 | 14 |
| ENSDARG00000097238 | <i>hbba1*</i> | 0  | 0  | 8  | 341 | 974  | 8  |
| ENSDARG00000089087 | <i>hbba1*</i> | 1  | 3  | 13 | 227 | 1169 | 21 |

**Table S3. Whole genome bisulfite sequencing of the sperm of hypoxic vs. control males**

The table lists the general sequencing statistics as well as the number of cytosine calls at either CG dinucleotides ("CG") or in other sequence contexts ("non-CG"), for the samples used in the experiments, mapped against the Zebrafish genome version 11 (GRCz11). Details of bioinformatic processing are provided in the Methods section. The frequency of non-CG methylation indicates the maximum rate of non-conversion during the bisulfite treatment step; by this measure, all libraries had a bisulfite conversion efficiency of at least 98.52%.

| Sample             | Reads number | Mapping eff. | Total unique map. | Methylated CG calls | Unmethylated CG calls | Total CG calls | % CG Methylation | Methylated non-CG calls | Unmethylated non-CG calls | Total non-CG calls | Non-CG Methylation |
|--------------------|--------------|--------------|-------------------|---------------------|-----------------------|----------------|------------------|-------------------------|---------------------------|--------------------|--------------------|
| WGBS_ZF_hypoxia_01 | 71407777     | 44.80%       | 32002473          | 40595086            | 7701958               | 48297044       | 84.05%           | 2891863                 | 204518174                 | 207410037          | 1.39%              |
| WGBS_ZF_hypoxia_02 | 63581861     | 44.90%       | 28517341          | 37211081            | 6924223               | 44135304       | 84.31%           | 2802223                 | 186459744                 | 189261967          | 1.48%              |
| WGBS_ZF_hypoxia_03 | 74348252     | 44.90%       | 33365526          | 41948900            | 7945201               | 49891101       | 84.07%           | 2933887                 | 212658962                 | 215592849          | 1.36%              |
| WGBS_ZF_control_01 | 60567819     | 45.10%       | 27287633          | 34647909            | 6480315               | 41128224       | 84.24%           | 2529456                 | 176922946                 | 179452402          | 1.41%              |
| WGBS_ZF_control_02 | 62901530     | 45.20%       | 28453313          | 35787583            | 6746571               | 42534154       | 84.14%           | 2558652                 | 183685718                 | 186244370          | 1.37%              |
| WGBS_ZF_control_03 | 74540770     | 45.20%       | 33692759          | 42528134            | 7911181               | 50439315       | 84.32%           | 3154853                 | 216091870                 | 219246723          | 1.44%              |
